# Supplementary material for: Goal-setting in geriatric rehabilitation: a systematic review and meta-analysis
Source: PubMed Central journal article supplement — Clin Rehabil. 2018 Dec 12;33(3):395–407. doi: 10.1177/0269215518818224 (PMC6416788; doi:10.1177/0269215518818224), 2018-12-12
Supplement: Supplemental_Material.pdf [file Supplemental_Material.pdf]

## Supplemental Material

### Appendix 1: Medline search string

- #1 "rehabilitation"[Subheading] OR "rehabilitation"[All Fields] OR "rehabilitation"[MeSH Terms]
- #2 "goal setting"[All Fields]
- #3 "goal pursuit"[All Fields]
- #4 "goal direct"[All Fields]
- #5 "goal attainment"[All Fields]
- #6 "goal orient\*"[All Fields]
- #7 "goal achievement"[All Fields]
- #8 "Canadian Occupational Performance Measure"[All Fields]
- #9 "Goal Attainment Scaling"[All Fields]
- #10 "(McMaster[All Fields] AND Toronto[All Fields] AND ("arthritis"[MeSH Terms] OR "arthritis"[All Fields]) AND ("surveys and questionnaires"[MeSH Terms] OR ("surveys"[All Fields] AND "questionnaires"[All Fields]) OR "surveys and questionnaires"[All Fields] OR "questionnaire"[All Fields]))
- #11 "Problem Elicitation Technique"[All Fields]
- #12 "Patient-Specific Complaints"[All Fields]
- #13 "Patient-Specific Functional Scale"[All Fields]
- #14 "Patient-Specific Index"[All Fields]
- #15 ("patients"[MeSH Terms] OR "patients"[All Fields] OR "patient"[All Fields]) AND ("goals"[MeSH Terms] OR "goals"[All Fields] OR "goal"[All Fields]) AND Priority[All Fields] AND ("surveys and questionnaires"[MeSH Terms] OR ("surveys"[All Fields] AND "questionnaires"[All Fields]) OR "surveys and questionnaires"[All Fields] OR "questionnaire"[All Fields]) OR ("patients"[MeSH Terms]
- #16 "patients"[All Fields] OR "patient"[All Fields]) AND ("goals"[MeSH Terms] OR "goals"[All Fields] OR "goal"[All Fields]) AND Priority[All Fields] AND List[All Fields]
- #17 "Self-Identified Goals Assessment"[All Fields]
- #18 "Talking Mats"[All Fields].
- #19 #1 AND (#2 OR #3 OR #4 OR #5 OR #6 OR #7 OR #8 OR #9 OR #10 OR #11 OR #12 OR #13 OR #14 OR #15 OR #16 OR #17 or #18)

### Appendix 2: Full-text articles excluded for the review

Ahn SN, Yoo EY, Jung MY, Park HY, Lee JY, Choi YI. Comparison of Cognitive Orientation to daily Occupational Performance and conventional occupational therapy on occupational performance in individuals with stroke: A randomized controlled trial. *Neuro Rehabilitation*. 2017;40(3):285-92.

Arnetz, J. E., Almin, I., Bergstrom, K., Franzen, Y., and Nilsson, H. Active Patient Involvement in the Establishment of Physical Therapy Goals: Effects on Treatment Outcome and Quality of Care. *Advances in Physiotherapy* 2014;6:2, 50-69.

Bertilsson AS, Ranner M, von Koch L, et al. A client-centred ADL intervention: Three-month follow-up of a randomized controlled trial. *Scand J Occup Ther* 2014;21(5):377-91.

- Bertilson AS, Eriksson G, Ekstam L, et al. A cluster randomized trial of client-centred, activities for people with stroke: One year follow-up of caregivers. *Clin Rehabil* 2016;30(8):765-775.
- Bizheva T, Lubenova D, Maznev I, Grigorova-Petrova K, Dimitrova A, Vasileva D, et al. Influence of early intensive rehabilitation on functional mobility after low back surgery. *Macedonian Journal of Medical Sciences*. 2016;4(4):661-4.
- Bühler S, Grötzbach H, Frommelt P. ICF-basierte Zieldefinition in der Neurorehabilitation. *Neurol Rehabil* 2005;11(4): 204–211.
- Cheng, W.L., The effects of mutual goal-setting practice in older adults with chronic illness. *Geriatr Nurs*, 2018;39(2): p. 143-150.
- Colquhoun H, Letts L, Law M, MacDermid J, Edwards M. Routine administration of the Canadian Occupational Performance Measure: effect on functional outcome *Aust Occup Ther J*. 2010;57(2):111-7.
- Dalton C, Farrell R, De Souza A, Wujanto E, McKenna-Slade A, Thompson S, Liu C, Greenwood R. Patient inclusion in goal setting during early inpatient rehabilitation after acquired brain injury. *Clin Rehabil*. 2012;26(2):165-73.
- Doig E, Fleming J, Kuipers P, Cornwell P, Khan A. Goal-directed outpatient rehabilitation following TBI: a pilot study of programme effectiveness and comparison of outcomes in home and day hospital settings. *Brain Inj*. 2011;25(11):1114-25.
- Lyons KD, Newman RM, Kaufman PA, Bruce ML, Stearns DM, Lansigan F, et al. Goal Attainment and Goal Adjustment of Older Adults During Person-Directed Cancer Rehabilitation. *American Journal of Occupational Therapy*. 2018;72(2): p. 1-8.
- Figueiredo, S., J.A. Morais, and N. Mayo, Managing mobility outcomes in vulnerable seniors ( MMOVEs): a randomized controlled pilot study. *Clin Rehabil*. 2017;31(12):1604-1615.
- Fuchs R, Goehner W, Seelig H. Long-term effects of a psychological group intervention on physical exercise and health: the MoVo concept. *J Phys Act Health*. 2011;8(6):794-803.
- Gauggel S, Hoop M, Werner K. Assigned versus self-set goals and their impact on the performance of brain-damaged patients. *J Clin Exp Neuropsychol*. 2002;24(8):1070-80.
- Gauggel S, Fischer S. The effect of goal setting on motor performance and motor learning in brain-damaged patients, *Neuropsych Rehabil*. 2001;11:1,33-44.
- Glattacker M, Dudeck A, Dibbelt S, Quatmann M, Greitemann B, Jäckel WH. [Evaluation of a collaborative goal setting intervention in patients with chronic back pain]. *Rehabilitation*. 2013;52(4):257-65.
- Grant M, Ponsford J, Bennett PC. The application of Goal Management Training to aspects of financial management in individuals with traumatic brain injury. *Neuropsychol Rehabil*. 2012;22(6):852-73.
- Holliday RC, Cano S, Freeman JA, Playford ED. Should patients participate in clinical decision making? An optimised balance block design controlled study of goal setting in a rehabilitation unit. *J Neurol Neurosurg Psychiatry*. 2007;78(6):576-80.
- Kolehmainen N1, Francis JJ. Specifying content and mechanisms of change in interventions to change professionals' practice: an illustration from the Good Goals study in occupational therapy. *Implement Sci*. 2012;18;7:100.
- Maloney FP. Goal attainment scaling. *Phys Ther*. 1993;73(2):123.

- McPherson KM, Kayes N, Weatherall M; A pilot study of self-regulation informed goal setting in people with traumatic brain injury. *Clin Rehabil*. 2009;23(4):296-309.
- Monaghan J, Channell K, McDowell D, Sharma AK. Improving patient and carer communication, multidisciplinary team working and goal-setting in stroke rehabilitation. *Clin Rehabil*. 2005;19(2):194-9.
- Moseley CB. A Functional Outcome-Based Approach to Evaluate the Quality of Geriatric Rehabilitation, *Phys & Occup Ther In Geri*. 1994;12:3,51-64.
- Ogunlana MO, Odole AC, Olagbegi OM, Williams OO. Augmenting conventional treatment of non-specific low back pain with progressive goal attainment programme. *Phys Ther Rev*. 2018;23(2):133-143.
- Okawa Y. [Rehabilitation for the promotion of functioning: a program based on the goal-oriented approach]. *Nihon Ronen Igakkai zasshi*, 2003;(40):582-5.
- Oldridge N, Guyatt G, Crowe J, Feeny D, Jones N. Goal attainment in a randomized controlled trial of rehabilitation after myocardial infarction. *J Cardiopulm Rehabil*. 1999;19(1):29-34.
- Ostelo RW, Köke AJ, Beurskens AJ, de Vet HC, Kerckhoffs MR, Vlaeyen JW, Wolters PM, Berfelo MW, van den Brandt PA. Behavioral-graded activity compared with usual care after first-time disk surgery: considerations of the design of a randomized clinical trial. *J Manipulative Physiol Ther*. 2000;23(5):312-9.
- Owensworth T, Fleming J, Shum D, Kuipers P, Strong J. Comparison of individual, group and combined intervention formats in a randomized controlled trial for facilitating goal attainment and improving psychosocial function following acquired brain injury. *J Rehabil Med*. 2008;40(2):81-8.
- Park MG, Ha Y. Effectiveness of a Self-management Program using Goal Setting based on a G-AP for Patients after a Stroke. *Jour Korean Acad Nurs*. 2014;44(5):581-591.
- Parsons J, Rouse P, Robinson EM, Sheridan N, Connolly MJ. Goal setting as a feature of homecare services for older people: does it make a difference? *Age Ageing*. 2012;41(1):24-9.
- Polatajko HJ, McEwen SE, Ryan JD, Baum CM. Pilot randomized controlled trial investigating cognitive strategy use to improve goal performance after stroke. *Am J Occup Ther*. 2012;66(1):104-9.
- Ponte-Allan M, Giles GM. Goal setting and functional outcomes in rehabilitation. *Am J Occup Ther*. 1999;53(6):646-9.
- Roessler R, Milligan T, Ohlson A. Personal adjustment training for the spinal cord injured. *Rehabil Couns Bull*. 1976;19(4),544-550.
- Theodorakis Y, Beneca A, Malliou P, Goudas M. Examining Psychological Factors during Injury Rehabilitation. *Journ Sport Rehab* 1997;6:4,355-363.
- Yip AM, Gorman MC, Stadnyk K, Mills WG, MacPherson KM, Rockwood K. A standardized menu for Goal Attainment Scaling in the care of frail elders. *Gerontologist*. 1998;38(6):735-42.

Supplemental Table 1: Risk of bias

| First author<br>(year of<br>publication) | Sequence<br>generation | Allocation<br>concealment | Blinding for<br>intervention | Blinding for<br>outcome | Incomplete<br>data | Selective<br>reporting | Other<br>sources of<br>bias |
|------------------------------------------|------------------------|---------------------------|------------------------------|-------------------------|--------------------|------------------------|-----------------------------|
| Beckerman<br>(2004)                      | High                   | High                      | High                         | High                    | Low                | Unclear                | High                        |
| Colquhoun<br>(2010)                      | High                   | High                      | High                         | High                    | Low                | Unclear                | High                        |
| Duncan (2003)                            | Unclear                | Unclear                   | High                         | Unclear                 | Low                | Unclear                | High                        |
| Gagné (2003)                             | High                   | High                      | High                         | Low                     | Unclear            | Unclear                | High                        |
| Guidetti (2010)                          | Low                    | Low                       | High                         | Low                     | Low                | Unclear                | High                        |
| Guidetti (2015)                          | Unclear                | Unclear                   | High                         | Low                     | Low                | Unclear                | High                        |
| Harwood<br>(2011)                        | Low                    | Low                       | High                         | Low                     | Low                | Unclear                | High                        |
| O'Brien (2013)                           | Low                    | Low                       | High                         | Low                     | High               | Unclear                | High                        |
| Oestergaard<br>(2012)                    | Unclear                | Low                       | High                         | Unclear                 | Low                | Unclear                | High                        |
| Ogawa (2016)                             | High                   | High                      | High                         | Low                     | High               | Unclear                | Low                         |
| Taylor (2011)                            | Low                    | Low                       | High                         | Low                     | Low                | Unclear                | High                        |
| Tomori (2015)                            | Low                    | Low                       | High                         | Low                     | High               | Unclear                | Unclear                     |
| Verhoef (2007)                           | High                   | High                      | High                         | High                    | Low                | Unclear                | High                        |
| Wressle (2002)                           | High                   | High                      | High                         | High                    | High               | Unclear                | High                        |
